# Supplementary material
Source: PubMed Central journal article supplement (PMC5802865)
Supplement: NIHMS938710-supplement-Supplementary__material.pdf [file NIHMS938710-supplement-Supplementary__material.pdf]

**Supplementary material – Baseline levels of analytes by diet group and insulin resistance status (IS, insulin sensitive; IR, insulin resistant), mean (SEM)**

| Biomarkers                                        | Lower Fat Diet |         |         | Lower Carb Diet |         |         | Walnut-Rich Diet |         |         |
|---------------------------------------------------|----------------|---------|---------|-----------------|---------|---------|------------------|---------|---------|
|                                                   | IS             | IR      | All     | IS              | IR      | All     | IS               | IR      | All     |
| <b>% Insulin resistant</b>                        | 0              | 100     | 52      | 0               | 100     | 52      | 0                | 100     | 50      |
| <b>Insulin (<math>\mu</math>U/mL)<sup>a</sup></b> | 9(0.4)         | 18(1)   | 14(1)   | 8(0.5)          | 22(1)   | 15(1)   | 9(0.3)           | 19(1)   | 14(1)   |
| <b>Glucose (mg/dL)<sup>b</sup></b>                | 95(1)          | 10(1)   | 97(1)   | 92(1)           | 102(1)  | 96(1)   | 95 (1)           | 100(2)  | 98(1)   |
| <b>HOMA-IR</b>                                    | 2(0.1)         | 5(0.3)  | 4(0.2)  | 2(0.1)          | 6(0.4)  | 4(0.3)  | 2(0.1)           | 5(0.3)  | 4(0.2)  |
| <b>Triglycerides (mg/dL)<sup>c</sup></b>          | 107(7)         | 154(14) | 131(8)  | 109(11)         | 146(9)  | 128(7)  | 89(5)            | 136(7)  | 112(5)  |
| <b>HDL cholesterol (mg/dL)<sup>d</sup></b>        | 64(3)          | 56(2)   | 60(2)   | 61(2)           | 55(2)   | 58(2)   | 64(2)            | 56(2)   | 60(2)   |
| <b>LDL cholesterol (mg/dL)<sup>d</sup></b>        | 115(5)         | 121(6)  | 118(4)  | 120(5)          | 125(5)  | 122(3)  | 123(5)           | 126(6)  | 125(4)  |
| <b>CRP (<math>\mu</math>g/mL)<sup>e</sup></b>     | 4(0.7)         | 6(0.8)  | 5(0.5)  | 3(0.4)          | 7(1.1)  | 5(0.6)  | 4(0.7)           | 5(0.9)  | 4(0.6)  |
| <b>IL-6 (pg/mL)</b>                               | 2(0.3)         | 3(0.3)  | 3(0.2)  | 3(0.4)          | 3(0.3)  | 3(0.2)  | 2(0.3)           | 3(0.3)  | 2(0.2)  |
| <b>SHBG (nmol/L)</b>                              | 66(5)          | 44(4)   | 54(3)   | 60(5)           | 54(6)   | 57(4)   | 64(6)            | 51(6)   | 58(4)   |
| <b>Estradiol (pg/mL)<sup>f</sup></b>              |                |         |         |                 |         |         |                  |         |         |
| <b>Premenopausal (n = 100)</b>                    | 132(20)        | 104(13) | 119(12) | 163(30)         | 133(21) | 145(17) | 118(14)          | 107(19) | 113(11) |
| <b>Postmenopausal (n = 145)</b>                   | 24(6)          | 27(7)   | 26(5)   | 29(7)           | 20(3)   | 25(4)   | 20(6)            | 25(6)   | 22(4)   |
| <b>Linoleic acid (%)</b>                          | 13(0.4)        | 13(0.4) | 13(0.3) | 13(0.4)         | 13(0.5) | 13(0.3) | 13(0.4)          | 13(0.3) | 13(0.2) |

|                                               |          |          |          |          |          |          |          |          |          |
|-----------------------------------------------|----------|----------|----------|----------|----------|----------|----------|----------|----------|
| <b><math>\alpha</math>-Linolenic acid (%)</b> | .13(.01) | .12(.01) | .12(.01) | .12(.01) | .11(.01) | .12(.01) | .13(.01) | .12(.01) | .12(.01) |
|-----------------------------------------------|----------|----------|----------|----------|----------|----------|----------|----------|----------|

<sup>a</sup> Multiply by 6.945 to obtain pmol/L.

<sup>b</sup> Multiply by 0.0555 to obtain mmol/L.

<sup>c</sup> Multiply by 0.0113 to obtain mmol/L.

<sup>d</sup> Multiply by 0.0259 to obtain mmol/L.

<sup>e</sup> Multiply by 9.524 to obtain nmol/L.

<sup>f</sup> Multiply by 3.671 to obtain pmol/L. Postmenopausal was defined as FSH  $\geq$  20 IU/L (and includes two subjects who reported themselves premenopausal at baseline).
